# Supplementary material for: Co-administration of genistein with doxorubicin-loaded polypeptide nanoparticles weakens the metastasis of malignant prostate cancer by amplifying oxidative damage
Source: Royal Society of Chemistry journal article supplement (doi:10.1039/c7bm01201b), 2018-01-01
Supplement: c7bm01201b1.pdf [file c7bm01201b1.pdf]

### Supporting Information

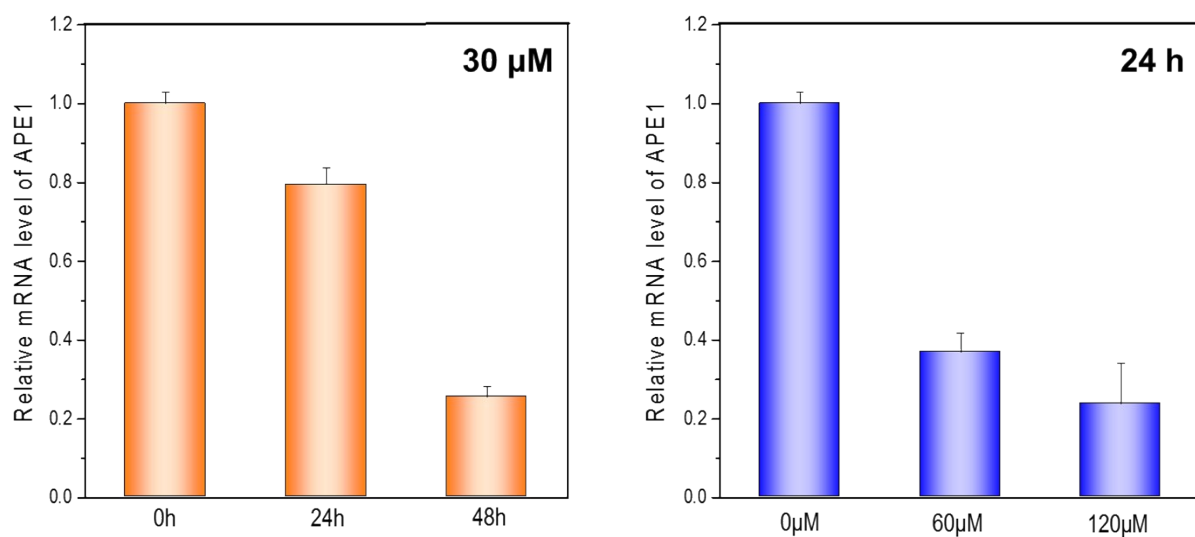

Fig. S1. The relative mRNA level of APE1 of RM-1 cells with the treatment of GEN at different times and doses (n=3).

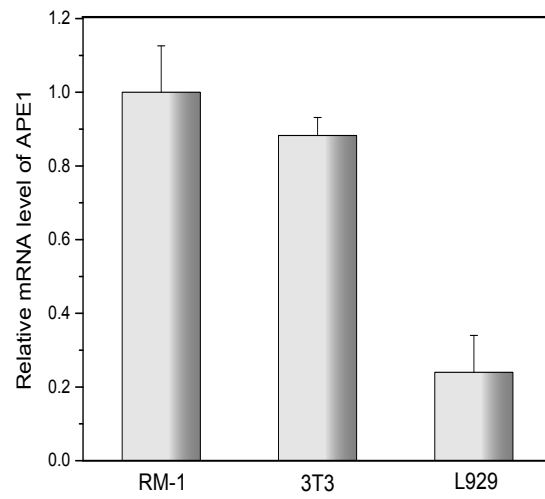

Fig. S2. The relative mRNA level of APE1 of RM-1 cells and normal mice cells (n=3).
